# Supplementary material
Source: MDPI journal article supplement (https://www.mdpi.com/1996-1073/13/18/4680)
Supplement: s1 [file s1]

Supplementary material

# Decarbonisation Using Hybrid Energy Solution: Case Study of Zagazig, Egypt

Mohammad Akrami <sup>1,\*</sup>, Samuel J. Gilbert <sup>1</sup>, Mahdiah Dibaj <sup>1</sup>, Akbar A. Javadi <sup>1</sup>,  
Raziye Farmani <sup>1</sup>, Alaa H. Salah <sup>2</sup>, Hassan E.S. Fath <sup>3</sup> and Abdelazim Negm <sup>4,\*</sup>

<sup>1</sup> Department of Engineering, University of Exeter, Exeter EX4 4QF, UK; sjg242@exeter.ac.uk (S.J.G.); md529@exeter.ac.uk (M.D.); a.a.javadi@exeter.ac.uk (A.A.J.); r.farmani@exeter.ac.uk (R.F.)

<sup>2</sup> City of Scientific Research and Technological Applications (SRTA), Alexandria 21934, Egypt; alaa.h.salah@gmail.com

<sup>3</sup> Environmental Engineering Department, School of Energy Resources, Environment, Chemical and Petrochemical Engineering (EECE), Egypt-Japan University of Science and Technology (E-JUST), Alexandria 21934, Egypt; hassan.fath@ejust.edu.eg (H.F.)

<sup>4</sup> Water and Water Structures Engineering Department, Faculty of Engineering, Zagazig University, Zagazig 44519, Egypt

\* Correspondence: m.akrami@exeter.ac.uk (M.A.); amnegm@zu.edu.eg or amnegm85@yahoo.com (A.N.)

Supplementary material 1 (S1):

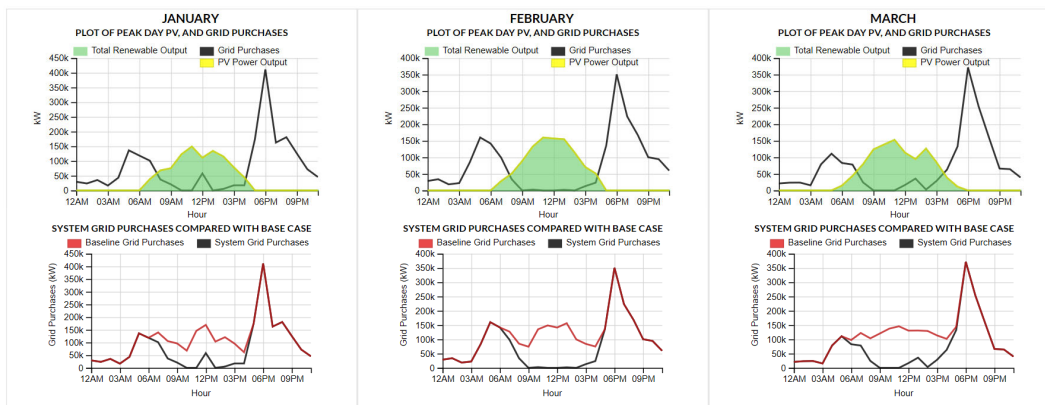

**Figure S1.** Monthly plots of peak day grid purchases compared for the base case (System 2) during January-March.

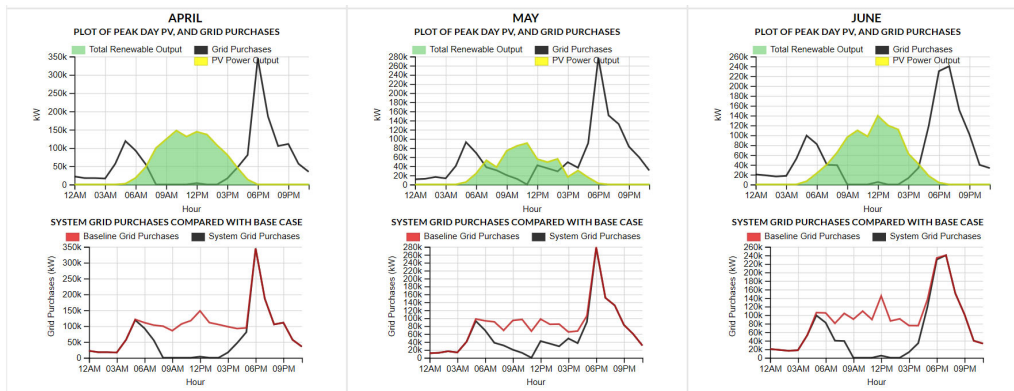

**Figure S2.** Monthly plots of peak day grid purchases for the base case (System 2) during April-June.

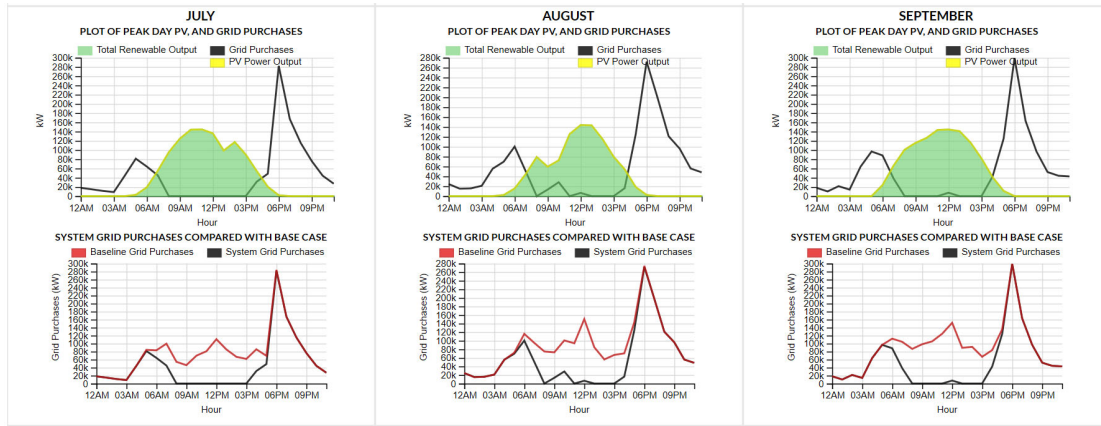

**Figure S3.** Monthly plots of peak day grid purchases for the base case (System 2) during July-September.

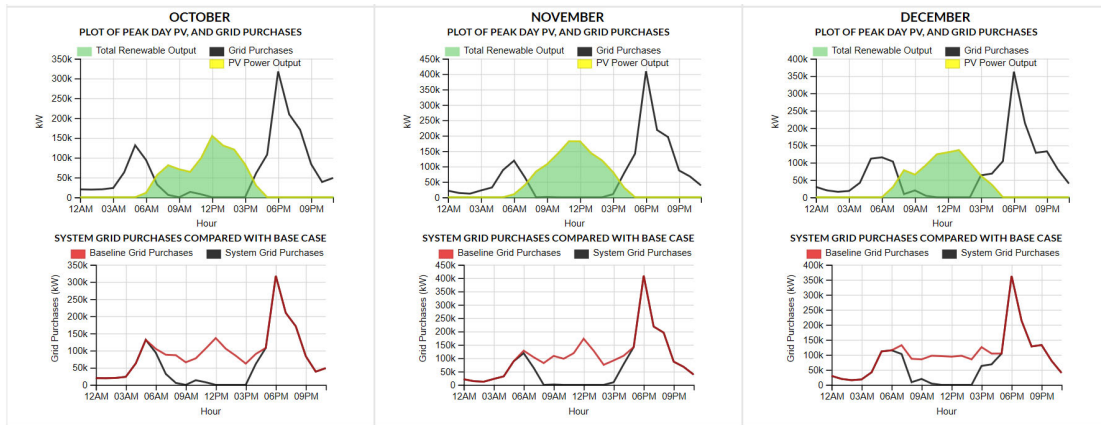

**Figure S4.** Monthly plots of peak day grid purchases for the base case (System 2) during October-December.
